# Supplementary material
Source: PubMed Central journal article supplement (PMC2488242)

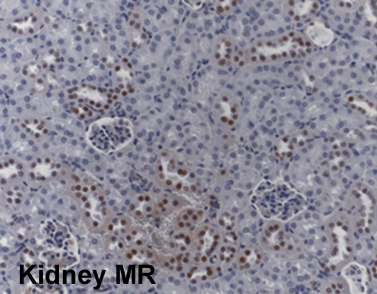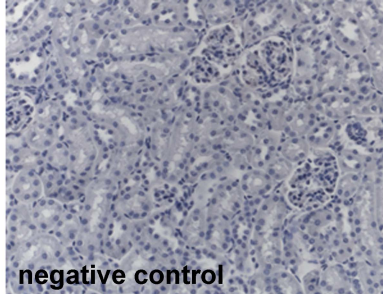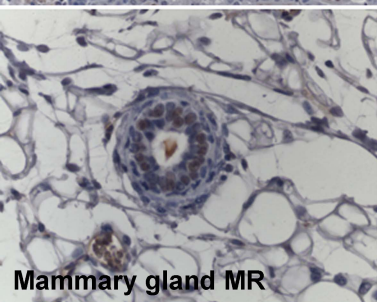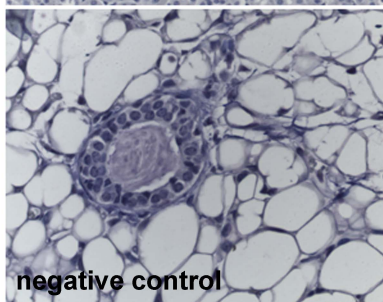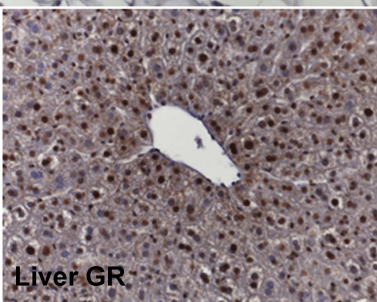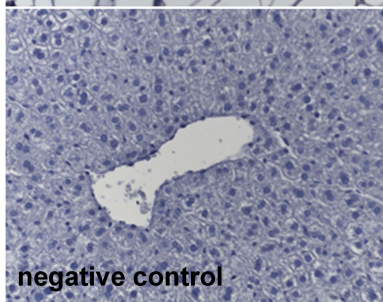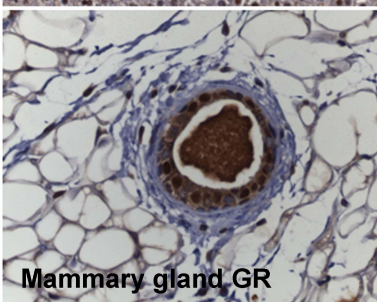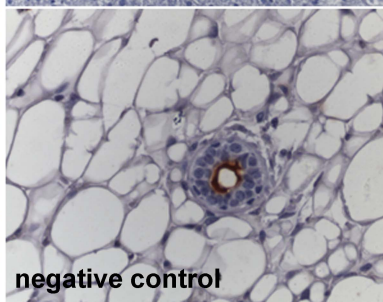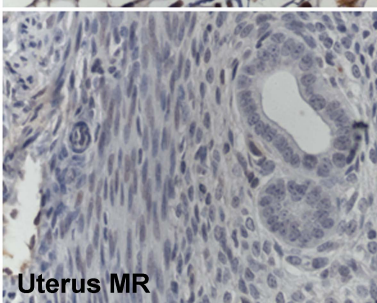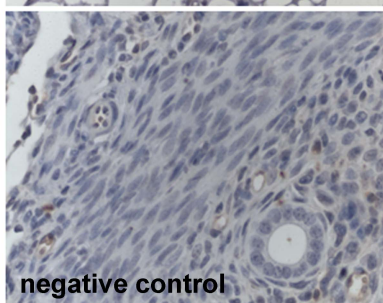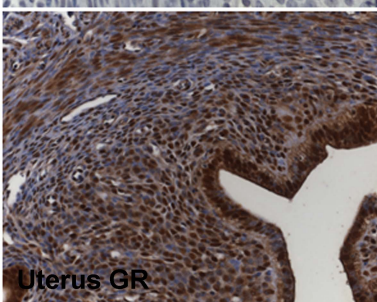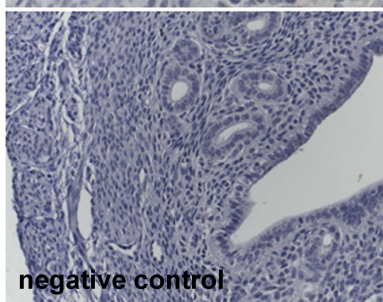

Supplement: en.2007-1612_1.pdf [file en.2007-1612_1.pdf]
